# Supplementary material for: Epithelial splicing regulatory protein 1 and 2 paralogues correlate with splice signatures and favorable outcome in human colorectal cancer
Source: PubMed Central journal article supplement (PMC5342015; doi:10.18632/oncotarget.12070), 2016-09-16
Supplement: oncotarget-07-73800-s001.pdf [file oncotarget-07-73800-s001.pdf]

# Epithelial splicing regulatory protein 1 and 2 paralogues correlate with splice signatures and favorable outcome in human colorectal cancer

## SUPPLEMENTARY FIGURES AND TABLES

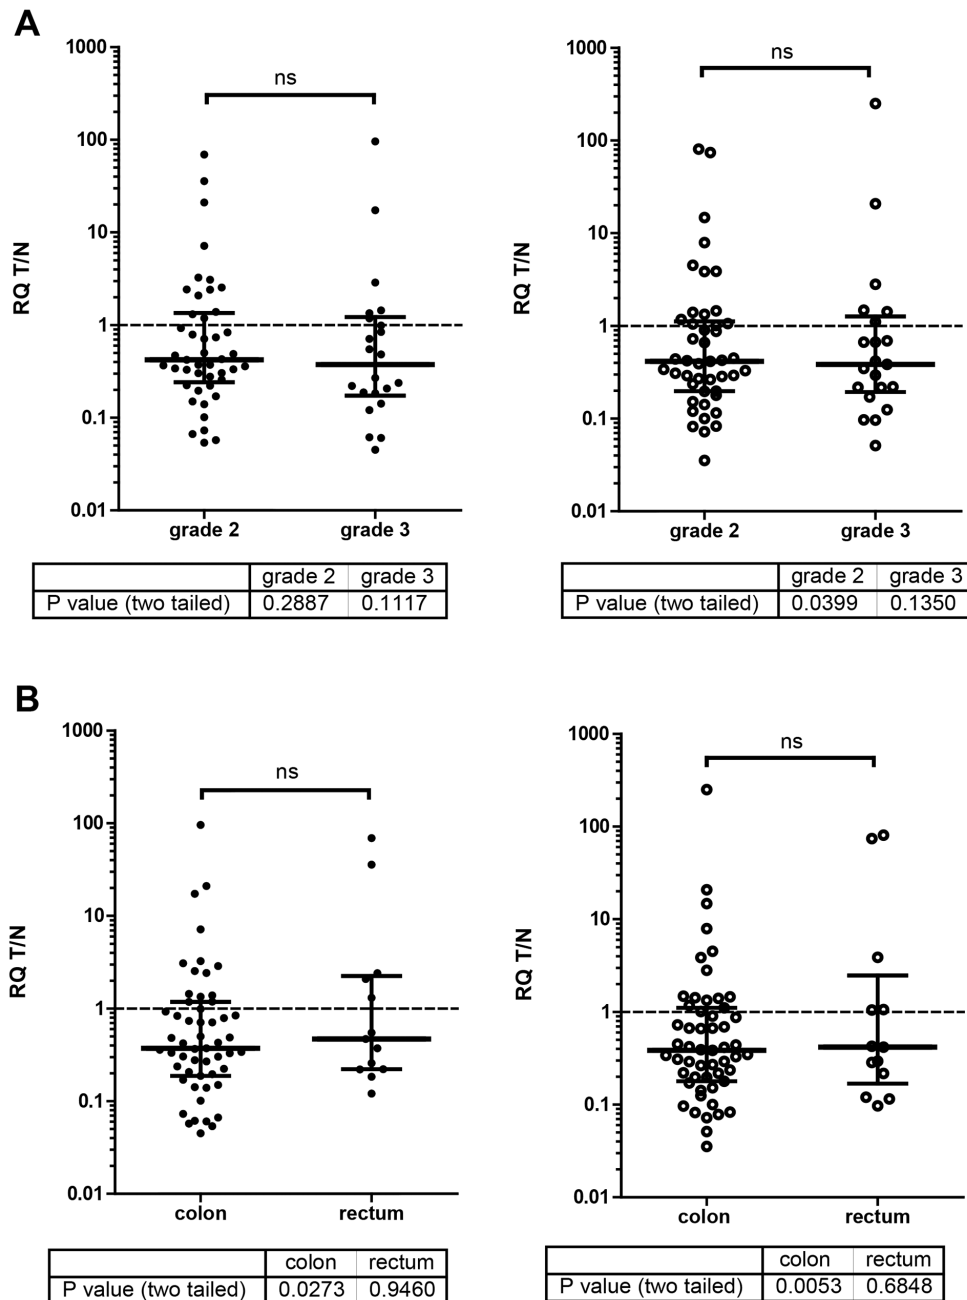

Supplementary Figure S1: ESRP RQ expression as T/N ratios of CRC cases were grouped by tumor grade **A.** and site **B.** gender **C.** and by age at diagnoses **D.** ESRP1 and ESRP2 closed and open circles, respectively. Median with interquartile range is indicated by error bars. Wilcoxon signed rank test of actual median against theoretical median of 1 resulted P values for groups as indicated below graph. A-C. Groups analyzed by Mann Whitney test resulted no significant (ns) P values <0.05. (Continued)

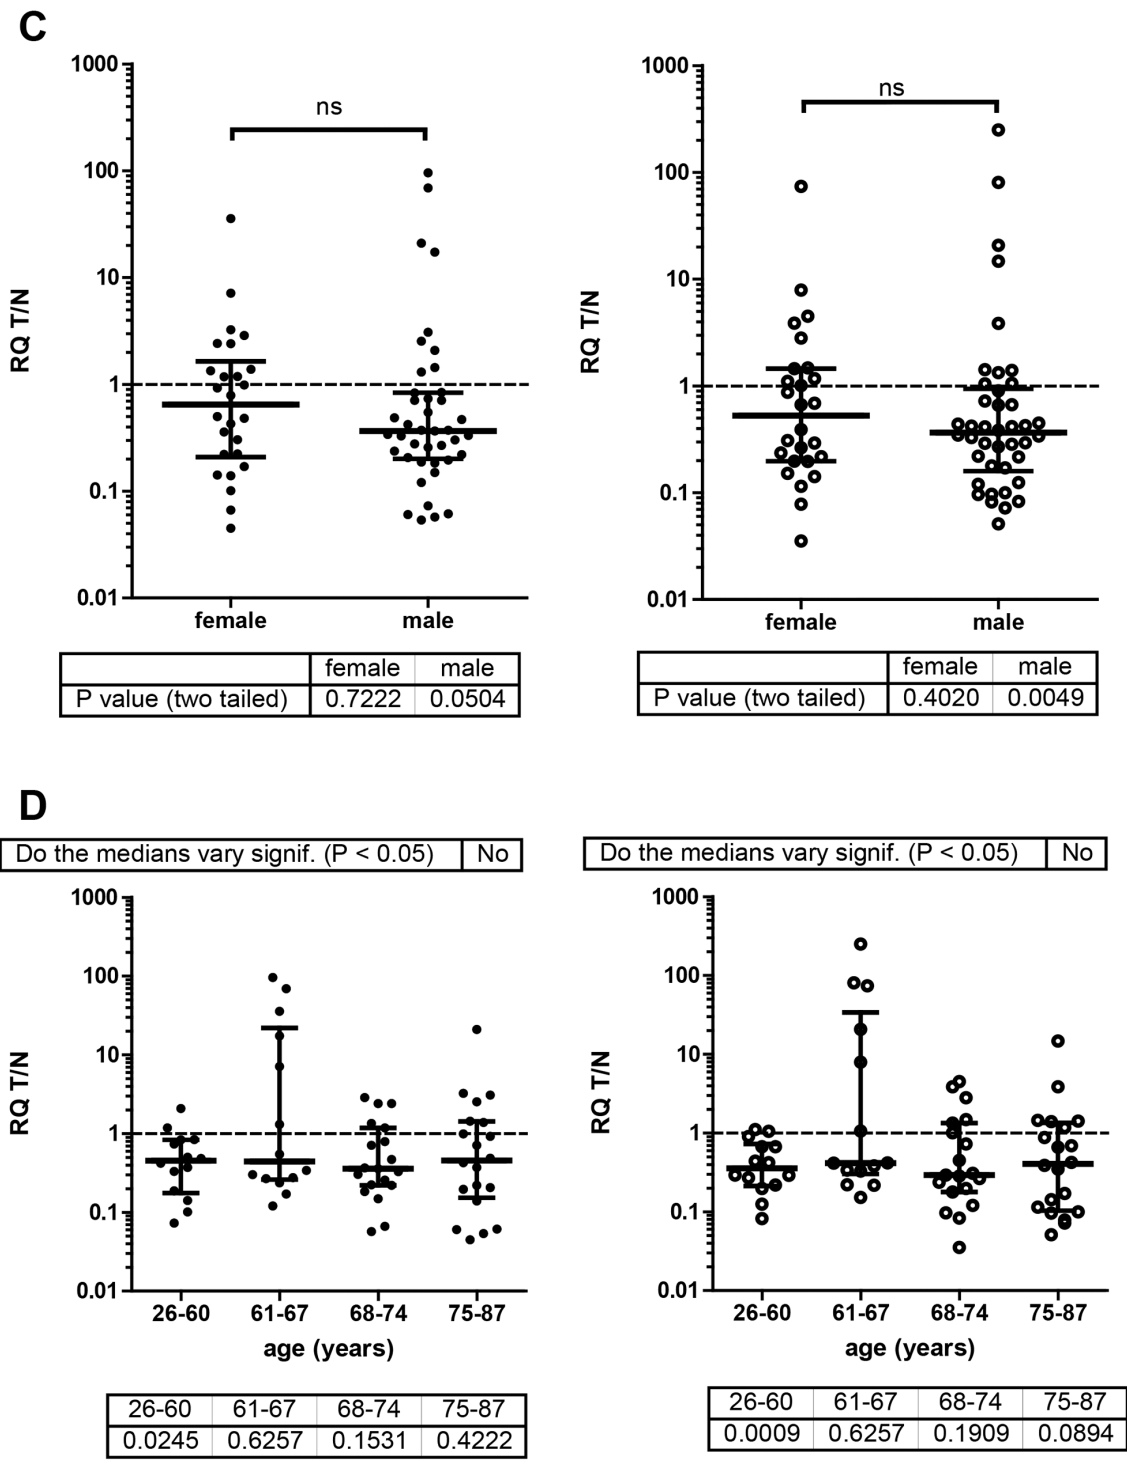

**Supplementary Figure S1: (Continued)** ESRP RQ expression as T/N ratios of CRC cases were grouped by tumor grade A. and site B. gender C. and by age at diagnoses D. ESRP1 and ESRP2 closed and open circles, respectively. Median with interquartile range is indicated by error bars. Wilcoxon signed rank test of actual median against theoretical median of 1 resulted P values for groups as indicated below graph. A-C. Groups analyzed by Mann Whitney test resulted no significant (ns) P values < 0.05. D. Four age groups analyzed by Kruskal-Wallis test with Dunn's multiple comparison test resulted no significant vary of the medians between age groups.

**A** Standardized ESRP1 grouping:  
 group 0 (-4.800, -0.219, n=139); group 1 (-0.216, 0.531, n=134); group 2 (0.540, 2.47, n=138)

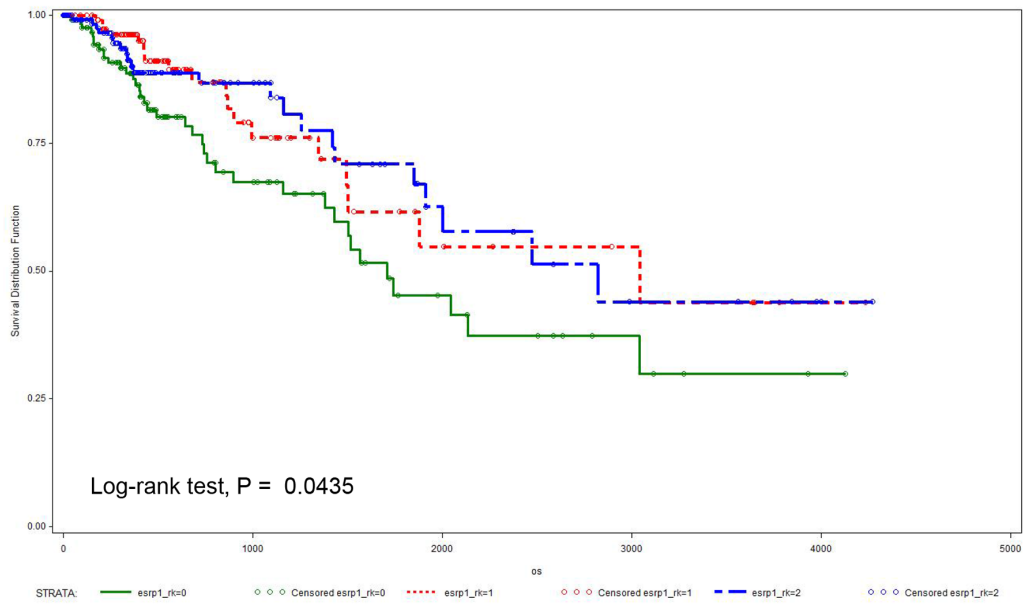

**B** ESRP2 grouping:  
 group 0 (-4.96, -0.33, n=138); group 1 (-0.31, 0.465, n=140); group 2 (0.468, 3.00, n=133)

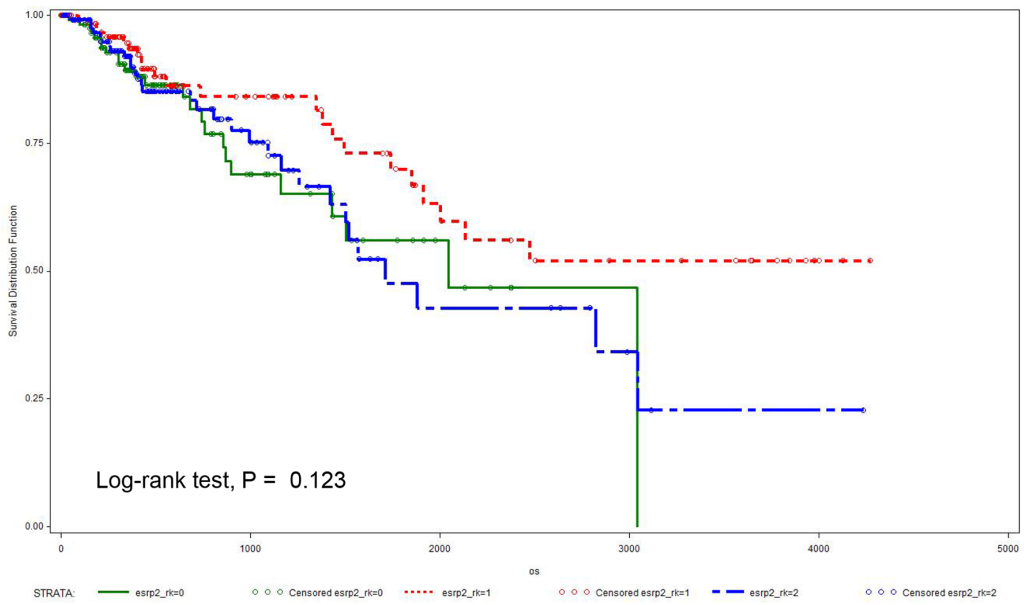

Supplementary Figure S2: Overall survival analyses of CRC patients (n=411) from TCGA COADREAD dataset.

**Supplementary Table S1: Correlations of ESRP 1-2 and FGFR 1-3 IIIb/IIIc RQ gene expression levels in tumor (T) and non-tumor (N) tissues of CRC cases\***

| Tissue | Transcript   | ESRP1           |              | ESRP2           |              | n  |
|--------|--------------|-----------------|--------------|-----------------|--------------|----|
|        |              | P-value         | coefficient  | P-value         | coefficient  |    |
| T      | ESRP1        |                 |              | <b>&lt;0.01</b> | <b>0.844</b> | 68 |
|        | ESRP2        | <b>&lt;0.01</b> | <b>0.844</b> |                 |              | 68 |
|        | FGFR1 IIIb/c | 0.43            |              | 0.19            |              | 28 |
|        | FGFR2 IIIb/c | 0.13            |              | 0.30            |              | 47 |
|        | FGFR3 IIIb/c | 0.93            |              | 0.98            |              | 28 |
| N      | ESRP1        |                 |              | <b>&lt;0.01</b> | <b>0.978</b> | 67 |
|        | ESRP2        | <b>&lt;0.01</b> | <b>0.978</b> |                 |              | 67 |
|        | FGFR1 IIIb/c | <b>0.01</b>     | <b>0.487</b> | <b>0.01</b>     | <b>0.471</b> | 27 |
|        | FGFR2 IIIb/c | <b>&lt;0.01</b> | <b>0.480</b> | <b>0.01</b>     | <b>0.367</b> | 48 |
|        | FGFR3 IIIb/c | 0.61            |              | 0.59            |              | 27 |

\*Pearson correlation coefficients and P-values <0.05 are indicated in bold, n matched log10 transformed RQ gene transcript level values used for correlation analyses.

**Supplementary Table S2: Primer sequences and results of primer pair efficiency rate measurements used for RT-qPCR**

| Primer*   | Sequence (5' ... 3')      | % Efficiency (R <sup>2</sup> ) |
|-----------|---------------------------|--------------------------------|
| ESRP1 for | TCCTGCTGTTCTGGAAAGTCG     | 94.4 (0.999)                   |
| ESRP1 rev | TCCGGTCTAACTAGCACTTCGTG   |                                |
| ESRP2 for | GGGTCTGGGAAGTCAAGACAATG   | 91.0 (0.998)                   |
| ESRP2 rev | CTTCGAAAACAATTGACTGCTGG   |                                |
| 36B4 for  | CCCATTCTATCATCAACGGGTACAA | 94.0 (0.987)                   |
| 36B4 rev  | CAGCAAGTGGGAAGGTGTAATCC   |                                |

\*ESRP forward (for) and reverse (rev) primer sequences were obtained from Gemmill et al., 2011 (Cancer Lett, 300, 66-78), 36B4 from Cawthon, 2002 (Nucleic Acids Res, 30, e47).

**Supplementary Table S3: Primer sequences and predicted alternative splice product size used for semi-quantitative PCR assays.**

See Supplementary File 1
